# Supplementary material for: Distinct and Contrasting Transcription Initiation Patterns at Mycobacterium tuberculosis Promoters
Source: PubMed Central journal article supplement (PMC3436766; doi:10.1371/journal.pone.0043900), 2012-09-07
Supplement: pone.0043900.s004.pdf [file pone.0043900.s004.pdf]

**Table S2** Comparison of transcription at *gyr* promoters of *E. coli*, *M. smegmatis* and *M. tuberculosis*

|                                | <i>E. coli</i>                                                          | <i>M. smegmatis</i>                       | <i>M. tuberculosis</i>                                                       | Reference          |
|--------------------------------|-------------------------------------------------------------------------|-------------------------------------------|------------------------------------------------------------------------------|--------------------|
| Gene organization              | Distant loci; <i>gyrA</i> -50.32 min, <i>gyrB</i> - 83.5min             | Dicistronic operon                        | Dicistronic operon                                                           | 8-10               |
| Promoters                      | Extended -10 - ( <i>gyrA</i> )<br>Canonical (-10,-35) - ( <i>gyrB</i> ) | P <sub><i>gyr</i></sub> - single promoter | P <sub><i>gyrB1</i></sub> , P <sub><i>gyrR</i></sub> - overlapping divergent |                    |
| Rate limiting step             | Promoter clearance                                                      | RP <sub>o</sub> formation                 | Promoter clearance                                                           | 5,11,<br>This work |
| Growth Phase Dependent Control | <i>gyr A</i> only                                                       | ND <sup>ψ</sup>                           | ↑iNTPs<br>↓ pppGpp                                                           |                    |
| RST <sup>Φ</sup>               | Promoter proximal elements                                              | CHPS* , promoter distal elements          | Overlapping promoters                                                        | 9,10,12            |

\* Cruciform Hairpin Palindromic Sequence

Φ Relaxation Stimulated Transcription

ψ Not detectable
