# Supplementary material for: Distinct and Contrasting Transcription Initiation Patterns at Mycobacterium tuberculosis Promoters
Source: PubMed Central journal article supplement (PMC3436766; doi:10.1371/journal.pone.0043900), 2012-09-07
Supplement: pone.0043900.s005.pdf [file pone.0043900.s005.pdf]

**Table S3** Strains, plasmids and oligonucleotides used in this study

| <b>Name</b>                    | <b>Description</b>                                                                                   | <b>Reference</b> |
|--------------------------------|------------------------------------------------------------------------------------------------------|------------------|
| <i>M.Smegmatis</i> SM07        | (HygR, the rpoC of the genome is replaced with the rpoC with a hexa-histidine coding tag at 3' end.) | 13               |
| <i>M.tuberculosis</i> H37Ra    | (A non-virulent laboratory strain of <i>M .tuberculosis</i> )                                        |                  |
| <i>E.coli</i> DH10B            | $\Delta$ (mrr-hsd RMS-mcrBC) mcrA recA1 Laboratory stock                                             |                  |
| pARN104                        | A derivative of pUC18                                                                                | This work        |
| pSD5B                          | Shuttle vector for genetic manipulation and molecular analysis of mycobacteria                       | 14               |
| pET21b- relNTD                 | pET21b inserted with rel-NTD                                                                         | 15               |
| P <sub>gyrB1</sub> sense       | GGTAAAAACGAGGCCGAGCACTCGGCCCTGGC<br>GCCCGATCACGGTACAGTGGTGTGCGACCCCT<br>GCGGCGACTC                   | This work        |
| P <sub>gyrB1</sub> antisense   | CCATTTTTGCTCCGGCTCGTGAGCCGGGACCGC<br>GGGCTAGTGCCATGTACCACACGCTGGGGGAC<br>GCCGCTGAG                   | This work        |
| P <sub>gyrR</sub> sense        | AGATGGGTAAAAACGAGGCCAGAAGATCGGCC<br>CTGGCGCCCGATCACGGACTTAGGGTGTGCGAC<br>CCCCTGCGGC                  | This work        |
| P <sub>gyrR</sub> antisense    | TCTACCCATTTTTGCTCCGTCTTCTAGCCGGGA<br>CCGCGGGCTAGTGCCTGAATCCCACACGCTGG<br>GGGACGCCG                   | This work        |
| P <sub>rrnPCL1</sub> sense     | TCACCTATGGATATCTATGGATGACCGAACCTG<br>GTCTTGACTCCATTGCCGATTTGTATTAGACTG<br>GCAGGGTTCGCCCCGAAGCGGGCGG  | This work        |
| P <sub>rrnPCL1</sub> antisense | AGCGGGGTGGATACCTATAGATACCTACTGGCT<br>TGGACCAGAACTGAGGTAACGGCCTAAACATAA<br>TCTGACCGTCCC GCTTCGCCCCGC  | This work        |
| P <sub>metU</sub> sense        | GCATGAGGCCGGGGCGCTAAACCGCTCGAAGC<br>ACGCACAAGCCATCGGACCGTAAATGGCTGCGC<br>CCCACCTCG                   | This work        |
| P <sub>metU</sub> antisense    | CGTACTCCGGCCCCCGCGATTTGGCGAGCTTCGT<br>GCGTGTTCGGTAGCCTGGCATTACCGACGCGG<br>GGTGGAGC                   | This work        |
