# Supplementary material for: Distinct and Contrasting Transcription Initiation Patterns at Mycobacterium tuberculosis Promoters
Source: PubMed Central journal article supplement (PMC3436766; doi:10.1371/journal.pone.0043900), 2012-09-07
Supplement: pone.0043900.s006.pdf [file pone.0043900.s006.pdf]

**Table S4** Sequence of primers used in this study

| Name                         | Description                      |
|------------------------------|----------------------------------|
| P <sub>gyrBI</sub> Forward   | CCGAGCTCTCGGCCCTGGCGCCCCGACCACGG |
| P <sub>gyrBI</sub> Reverse   | CCGGAGCTCGCCTCGTCGACCCGCGTTGTC   |
| P <sub>gyrR</sub> Forward    | CCGAGCTCTCGGCCCTGGCGCCCCGACCACGG |
| P <sub>gyrR</sub> Reverse    | ACGAGCTCGTGATCGGGCGCCAGGGCCG     |
| P <sub>rrnPCLJ</sub> Forward | TGGAGCTCGACGGTCACCTATGGATATCTATG |
| P <sub>rrnPCLJ</sub> Reverse | AAGAGCTCTCCAAACAAAACCCAAACACTCCC |
| P <sub>metU</sub> Forward    | AAGAGCTCCGCTGATCTGGGCGGTCGTAC    |
| P <sub>metU</sub> Reverse    | CTGAGCTCCGAAGCTTGACGTTTCAGACCG   |

### Supplementary references

1. Gourse RL, Gaal T, Bartlett MS, Appleman JA, Ross W (1996) rRNA transcription and growth rate-dependent regulation of ribosome synthesis in *Escherichia coli*. *Annu Rev Microbiol* 50: 645-677.
2. Gonzalez-y-Merchand JA, Colston MJ, Cox RA (1996) The rRNA operons of *Mycobacterium smegmatis* and *Mycobacterium tuberculosis*: comparison of promoter elements and of neighboring upstream genes. *Microbiology* 142 ( Pt 3): 667-674.
3. Verma A, Sampla AK, Tyagi JS (1999) *Mycobacterium tuberculosis* *rrn* promoters: differential usage and growth rate-dependent control. *J Bacteriol* 181: 4326-4333.
4. Gaal T, Bartlett MS, Ross W, Turnbough CL, Jr Gourse RL (1997) Transcription regulation by initiating NTP concentration: rRNA synthesis in bacteria. *Science* 278: 2092-2097.
5. China A, Tare P, Nagaraja V (2010) Comparison of promoter-specific events during transcription initiation in mycobacteria. *Microbiology* 156: 1942-1952.
6. Arnvig KB, Gopal B, Papavinasundaram KG, Cox RA, Colston MJ (2005) The mechanism of upstream activation in the *rrnB* operon of *Mycobacterium smegmatis* is different from the *Escherichia coli* paradigm. *Microbiology* 151: 467-473.
7. Cole ST, Brosch R, Parkhill J, Garnier T, Churcher C, et al. (1998) Deciphering the biology of *Mycobacterium tuberculosis* from the complete genome sequence. *Nature* 393: 537-544.
8. Bachmann, BJ (1987) Linkage map of *Escherichia coli* K-12, edition 7. In *Escherichia Coli* and *Salmonella Typhimurium* (ed F.C. Neidhardt). 807–877. Washington: American Society for Microbiology.
9. Unniraman S, Nagaraja V (1999) Regulation of DNA gyrase operon in *Mycobacterium smegmatis*: a distinct mechanism of relaxation stimulated transcription. *Genes to Cells* 4: 697–706.
10. Unniraman S, Chatterji M, Nagaraja V (2002) DNA gyrase genes in *Mycobacterium tuberculosis*: a single operon driven by multiple promoters. *J Bacteriol* 184: 5449-5456.
11. Menzel R, Gellert M (1983) Regulation of the genes for *E.coli* DNA gyrase: homeostatic control of DNA supercoiling. *Cell* 34: 105–113.
12. Straney R, Krah R, Menzel R (1994) Mutations in the -10 TATAAT sequence of the *gyrA* promoter affect both promoter strength and sensitivity to DNA supercoiling. *J Bacteriol* 176: 5999–6006.
13. Mukherjee R, Chatterji D (2008) Stationary phase induced alterations in mycobacterial RNA polymerase assembly: A cue to its phenotypic resistance towards rifampicin. *Biochem Biophys Res Commun* 369: 899-904.
14. Jain S, Kaushal D, DasGupta SK, Tyagi AK (1997) Construction of shuttle vectors for genetic manipulation and molecular analysis of mycobacteria. *Gene* 190: 37-44.
15. Jain V, Saleem-Batcha R, China A, Chatterji D (2006) Molecular dissection of the mycobacterial stringent response protein Rel. *Protein Sci* 15: 1449-1464.
